# Supplementary material for: Dynamic biochemical tissue analysis detects functional selectin ligands on human cancer tissues
Source: PubMed Central journal article supplement (PMC6560120; doi:10.1038/s41598-019-44838-4), 2019-06-11
Supplement: 41598_2019_44838_MOESM1_ESM.pdf [file 41598_2019_44838_MOESM1_ESM.pdf]

## **Supplemental Information**

### **Dynamic biochemical tissue analysis detects functional selectin ligands on human cancer tissues**

Eric W. Martin<sup>1,2</sup>, Ramiro Malgor<sup>1,3</sup>, Vicente A. Resto<sup>5</sup>, Douglas J. Goetz<sup>1,2</sup>, and Monica M. Burdick<sup>1,2,4,\*</sup>

<sup>1</sup>Biomedical Engineering Program, <sup>2</sup>Department of Chemical and Biomolecular Engineering, Russ College of Engineering and Technology, <sup>3</sup>Department of Biomedical Sciences, Heritage College of Osteopathic Medicine, and <sup>4</sup>Edison Biotechnology Institute, Ohio University, Athens, OH 45701. <sup>5</sup>Department of Otolaryngology, University of Texas-Medical Branch, Galveston, TX 77555.

\*Corresponding author email address: [burdick@ohio.edu](mailto:burdick@ohio.edu)

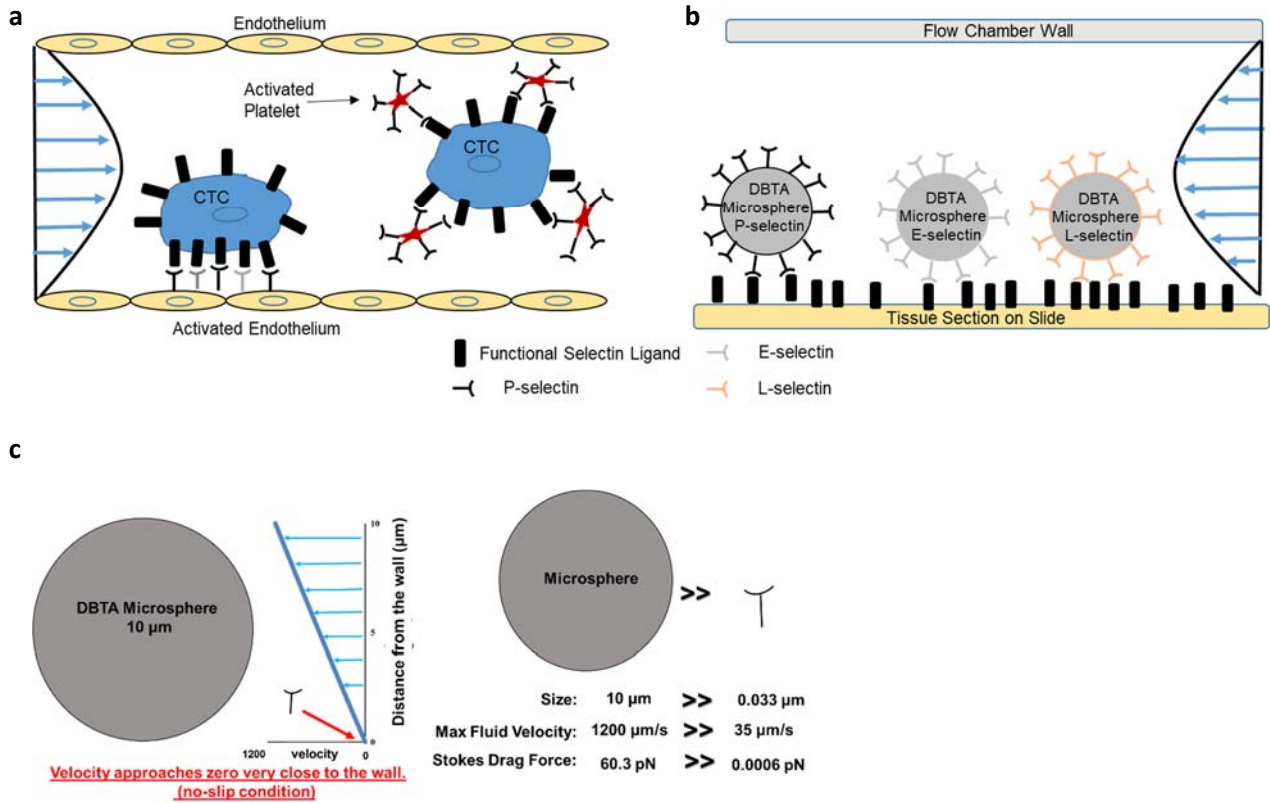

**Supplementary Figure S1. Introduction to DBTA (dynamic biochemical tissue analysis)**

**(a)** Tumor cells may express functional selectin ligands that can bind to selectins expressed by activated platelets (P-selectin), activated endothelium (E- and P-selectin), or leukocytes (L-selectin, not pictured). The cell-cell adhesion mediated by selectin ligands on tumor cells to selectins on the non-tumor cells may facilitate metastatic colonization of secondary sites. **(b)** DBTA involves the perfusion of polystyrene microspheres that are coated with molecular probes (e.g., selectins) at well-defined wall shear stresses. The fluid profile and delivery trajectories of particles in the flow chamber are well-documented<sup>36,37,68,69</sup>. The purpose of coating a particle with the desired molecular probe is to assist in transducing hydrodynamic forces to the desired level of mechanical force that is to be exerted on the bond between the receptor (i.e., the selectin on the probe) and ligand (i.e., the selectin ligand expressed on the tissue section on the slide). As demonstrated in Figures 2-8 of the main manuscript, selectin ligands are detected more often on cancerous tissues than on non-cancerous tissues. Ultimately, detection of selectin ligands *in situ* in tissue sections from tumors may give insights towards the expression and regulation of selectin ligands on circulating tumor cells in (a). **(c)** An order of magnitude analysis shows the viscous drag (force) exerted on the immersed, ideal body of an antibody perfused over a biospecimen at 1.00 dyne/cm<sup>2</sup> is negligible when compared to that of a DBTA probe (microsphere).

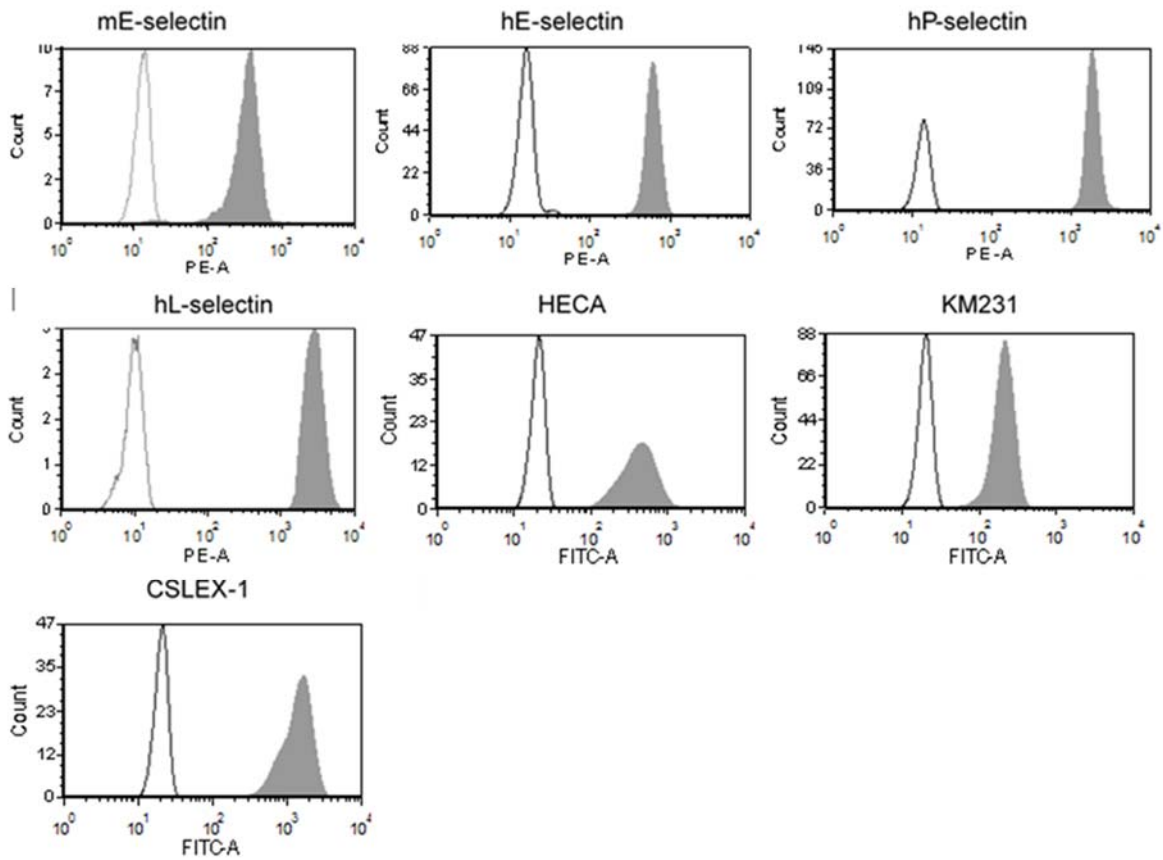

**Supplementary Figure S2.** Surface coverage of the DBTA probes (polystyrene microspheres conjugated with the indicated molecular probe). For all histograms, filled curves show a clear shift to the right when compared to the control, shown as an open curve, demonstrating successful DBTA probe functionalization.

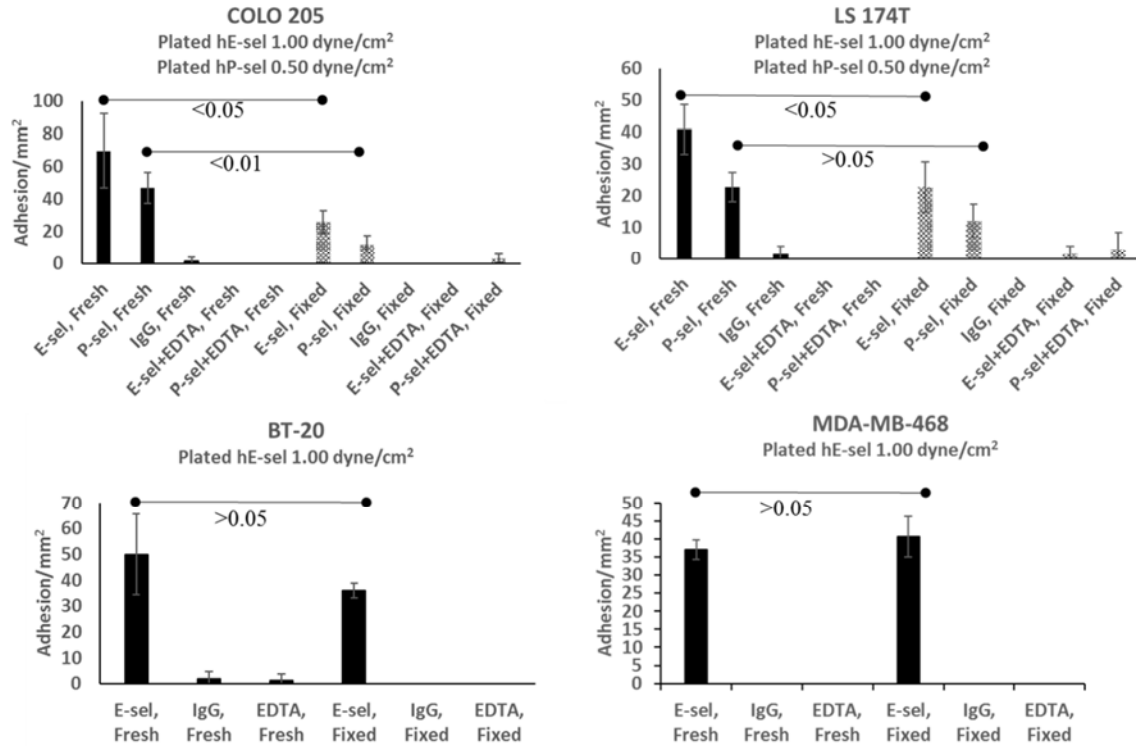

**Supplementary Figure S3 Part A. Formalin fixation does not increase binding of cancer cell lines to plated selectins under flow.** Untreated (fresh) and formalin-fixed (10,000 cells/mL of 10% neutral buffered formalin for 10 minutes at RT) COLO 205, LS174T, BT-20, and MDA-MB-468 cell lines were perfused over plated (human) E-selectin (5 ug/mL), P-selectin (10 ug/mL), and hIgG (10 ug/mL) at 250,000 cells/mL DPBS+ for 2 minutes at the indicated wall shear stress. Plating occurred overnight at 4°C and was followed by a block in 1% FBS/BSA for 1 hour at 4°C. Cells were harvested with 5 mM EDTA/DPBS-. Prior to perfusion, cell concentration was verified using a Scepter handheld cell counter. The specificity of interaction was confirmed using 10 mM EDTA and plated IgG as negative controls. Data shown are mean adhesion ± SD of three independent experiments. Relevant P-values are shown in the figure and indicate that selectin ligand mediated adhesion is either diminished or unaltered following fixation.

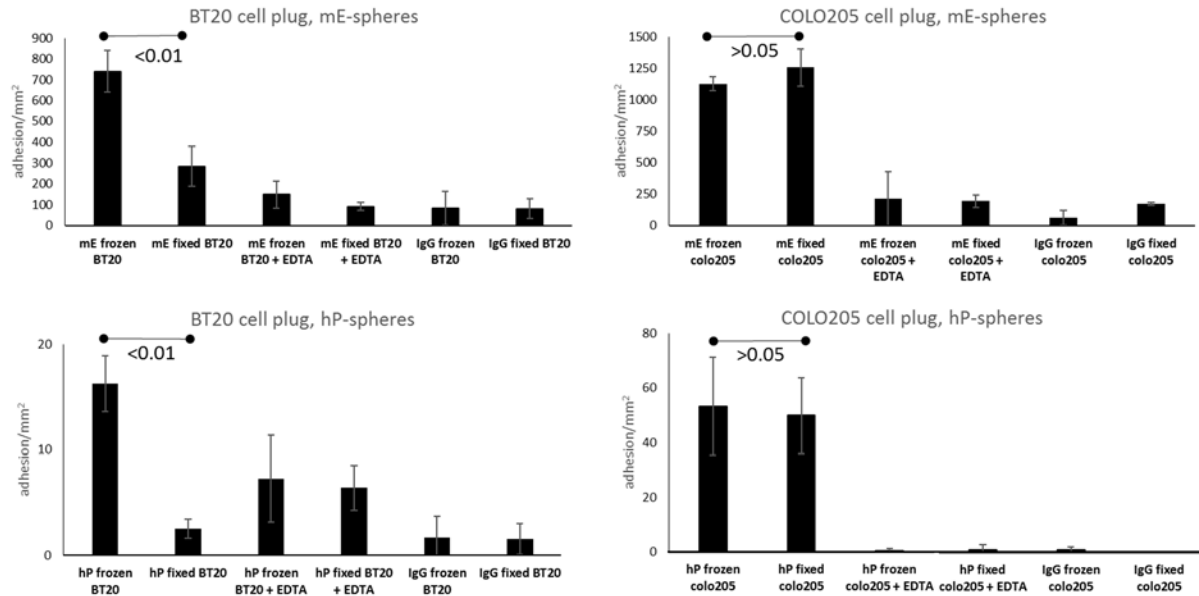

**Supplementary Figure S3 Part B. Formalin fixation and paraffin embedding does not increase binding of selectin DBTA probes to mock tissue consisting of microtome-sectioned cell line plugs (pellets).** mE- and hP-selectin DBTA probes perfused at 0.50 dyne/cm<sup>2</sup> and 500,000 probes/mL DBPS+ specifically adhered to mock tissues consisting of either BT-20 or COLO 205 microtome-sectioned cell plugs. Specificity of interaction was confirmed using 10 mM EDTA and hlgG DBTA probes as negative controls. Data shown are mean adhesion  $\pm$  SD of three independent experiments in which DBTA probes were perfused over three cell plug serial sections. P-values indicate that selectin ligand mediated adhesion is either diminished or unaltered following formalin fixation and paraffin embedding.

For fresh mock tissue cell line plugs, harvested cells were formed into a pellet using a protocol adapted from the Johns Hopkins University Oncology Tissue Services (which can be found at [http://tmalab.jhmi.edu/docs/Cell\\_line\\_block\\_procedure\\_Jan2013.pdf](http://tmalab.jhmi.edu/docs/Cell_line_block_procedure_Jan2013.pdf)), embedded in OCT cryomatrix, and sectioned at 5  $\mu$ m. Then the plug section was placed onto a slide and washed 3x in DPBS and blocked in 1% BSA/1% FBS in DPBS+ for 1 hr prior to conducting DBTA. For mock tissue FFPE cell line plugs, harvested cells were formed into a pellet then fixed in 10% neutral buffered formalin for 24 hours at RT followed by a wash in DPBS x2. The cell pellet was placed in a stainless steel, tissue base mold container and then carefully dehydrated by slowly adding and removing the following liquids in sequence: 70% ethanol, 95% ethanol, 100% ethanol x2, and xylene x3. The cell plug was then embedded in paraffin and sectioned using a microtome at 5  $\mu$ m. Sections were deparaffinized using consecutive incubations for 3 minutes each in xylene x3, 100% ethanol twice, 95% ethanol, 70% ethanol, and DPBS. Sections of the FFPE cell line plugs were then blocked in 1% BSA and 1% FBS in DPBS+ for 1 hr prior to conducting DBTA.

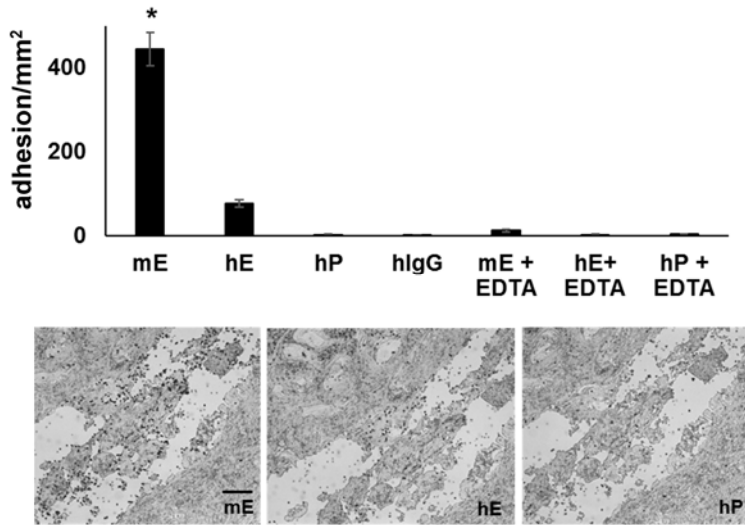

**Supplementary Figure S4. The greatest amount of specific adhesion occurs with mE-selectin DBTA probe.** mE-, hE-, hP-selectin DBTA probes adhered to lung adenocarcinoma tissue. Probes were perfused at 250,000 probes/mL and 0.50 dyne/cm<sup>2</sup>. Data shown are mean adhesion  $\pm$  SD of three technical replicates and are representative of independent experiments conducted on  $n > 10$  independent cases, including lung, ovarian, pancreatic, and stomach tissue samples. Specificity of interaction was confirmed using hIgG probes as well as with each respective selectin DBTA probe perfused in 10 mM EDTA. Scale bar = 100  $\mu$ m. \*  $P < 0.001$  compared to all other conditions.

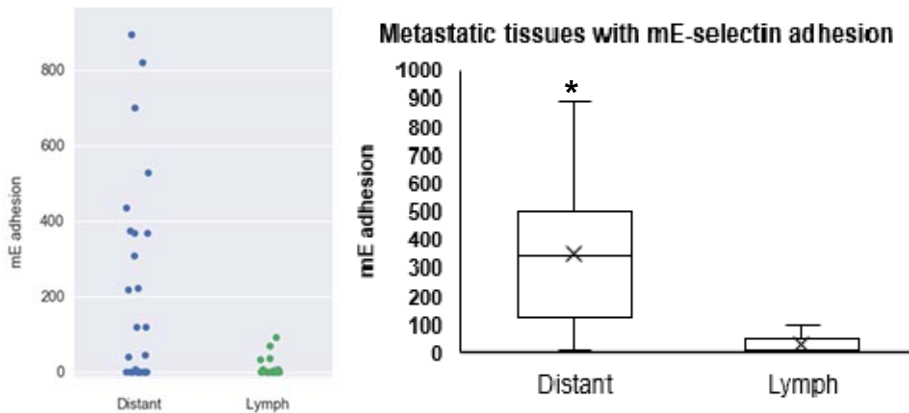

**Supplementary Figure S5. mE-selectin DBTA probe adhesion per mm<sup>2</sup> by the site of metastasis, classified as either distant (e.g., hematogenous) or lymphatic.** \*  $P = 0.0021$ .

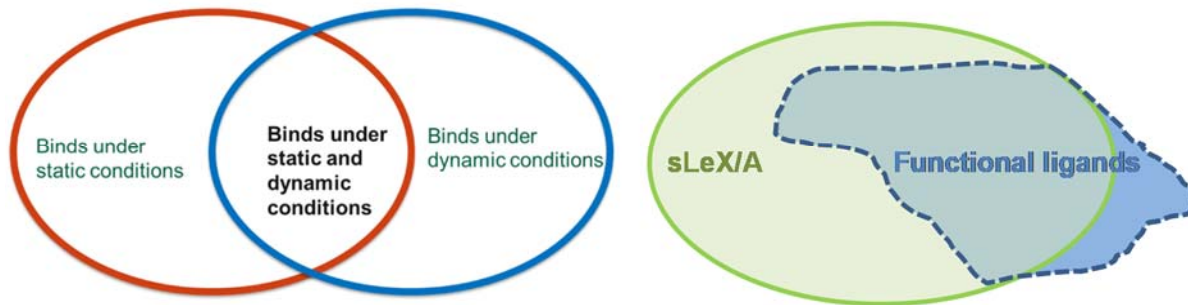

**Supplementary Figure S6.** Proposed Venn diagrams representing the complex relationship between selectin ligands that bind to selectins under static conditions versus those that bind to selectins under dynamic conditions. This representation extends to the partitioning of functional selectin ligands that express sLeX/A.

### Tumor Origin

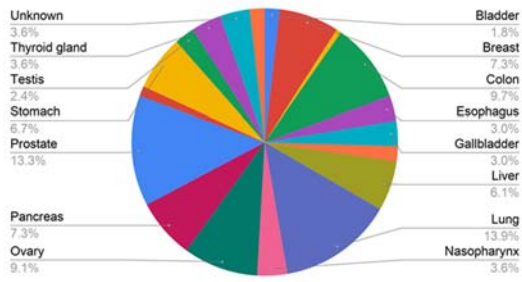

### Sites of Metastasis

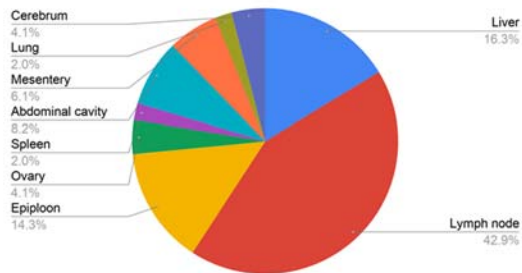

### TNM Stage

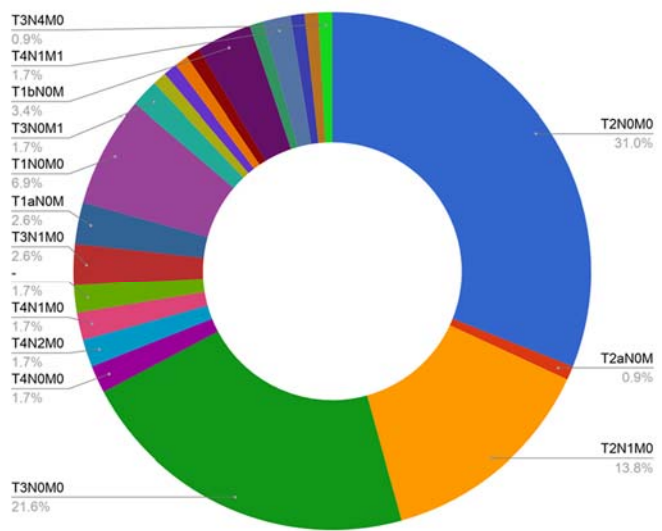

### Histogram of Age

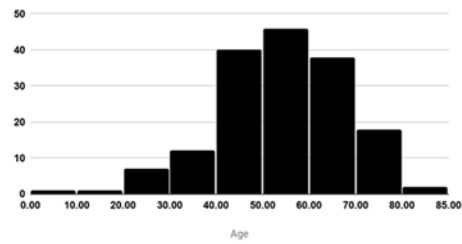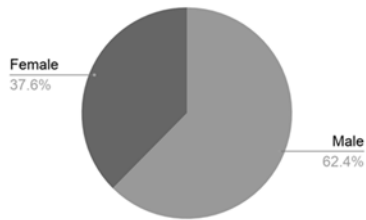

### Histogram of mE Adhesion

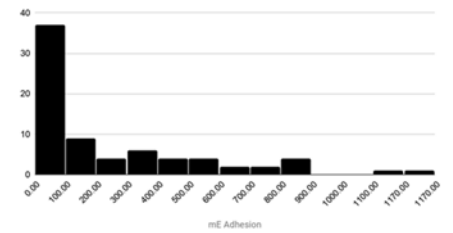

Supplementary Figure S7. Profile of the cases examined in this study.



| <b>Supplementary Table S1. Corresponding P-values for Figure 6.</b> |          |         |               |
|---------------------------------------------------------------------|----------|---------|---------------|
|                                                                     | hP, EDTA | hlgG    | hP, sialidase |
| colon mucinous adenocarcinoma                                       | 0.001    | 0.0008  | 0.0008        |
| colon adenocarcinoma                                                | 0.0036   | 0.001   | 0.0017        |
| colon signet ring cell carcinoma                                    | 0.0002   | <0.0001 | 0.0001        |
| lung papillary adenocarcinoma                                       | 0.0014   | 0.0005  | 0.0005        |
| lung bronchioalveolar carcinoma                                     | <0.0001  | <0.0001 | <0.0001       |
| lung adenocarcinoma                                                 | 0.0004   | <0.0001 | <0.0001       |
| ovarian mucinous adenocarcinoma                                     | 0.001    | 0.001   | 0.001         |
| ovarian endometrioid adenocarcinoma                                 | 0.0002   | <0.0001 | 0.0002        |
| pancreatic adenocarcinoma                                           | 0.001    | <0.0001 | 0.0009        |
| pancreatic duct adenocarcinoma I                                    | 0.022    | 0.0024  | 0.01          |
| pancreatic duct adenocarcinoma II                                   | 0.0008   | <0.0001 | <0.0001       |
| stomach adenocarcinoma I                                            | 0.011    | 0.0001  | 0.046         |
| stomach adenocarcinoma II                                           | 0.0002   | <0.0001 | 0.07          |

Supplementary Table S2

| Age | M/F | Organ       | Cancer Type                                                     | TNM       | Grade | met/primary | Met Site         | mE adhesion |
|-----|-----|-------------|-----------------------------------------------------------------|-----------|-------|-------------|------------------|-------------|
| 50  | M   | Bladder     | transitional cell carcinoma                                     | T2N0M0    | II    | primary     |                  | 50          |
| 68  | M   | Bladder     | transitional cell carcinoma                                     | T2N0M0    | II    | primary     |                  | 0           |
| 57  | M   | Bladder     | transitional cell carcinoma                                     | T2aN0M0   | II    | primary     |                  | 0           |
| 34  | F   | Breast      | metastatic adenocarcinoma from breast                           |           |       | metastatic  | Liver            | 0           |
| 48  | F   | Breast      | metastatic adenocarcinoma of oter from breast                   |           |       | metastatic  | Lymph node       | 0           |
| 53  | F   | Breast      | metastatic adenocarcinoma of oter from breast                   |           |       | metastatic  | Lymph node       | 0           |
| 66  | M   | Breast      | metastatic adenocarcinoma of oter from breast                   |           |       | metastatic  | Lymph node       | 0           |
| 42  | F   | Breast      | metastatic adenocarcinoma of oter from breast                   |           |       | metastatic  | Lymph node       | 5           |
| 58  | F   | Breast      | metastatic adenocarcinoma of oter from breast                   |           |       | metastatic  | Lymph node       | 33          |
| 46  | F   | Breast      | metastatic adenocarcinoma of oter from breast                   |           |       | metastatic  | Lymph node       | 69          |
| 57  | F   | Breast      | ductal carcinoma                                                | T2N0M0    | III   | primary     |                  | 43          |
| 50  | F   | Breast      | ductal carcinoma                                                | T2N1M0    |       | primary     |                  | 168         |
| 42  | F   | Breast      | invasive ductal carcinoma                                       | T3N0M0    | IIB   | primary     |                  | 0           |
| 37  | F   | Breast      | invasive ductal carcinoma                                       | T2N1M0    | IIB   | primary     |                  | 0           |
| 51  | F   | Breast      | invasive ductal carcinoma                                       | T2N1M0    | IIB   | primary     |                  | 0           |
| 36  | F   | Cervix      | metastatic squamous cell carcinoma of pelvic cavity from cervix |           |       | metastatic  | Lymph node       | 7           |
| 67  | F   | Colon       | metastatic adenocarcinoma from colon                            |           |       | metastatic  | Epiploon         | 0           |
| 55  | M   | Colon       | metastatic mucinous adenocarcinoma from colon                   |           |       | metastatic  | Liver            | 0           |
| 58  | M   | Colon       | metastatic adenocarcinoma from colon                            |           |       | metastatic  | Liver            | 0           |
| 54  | F   | Colon       | metastatic mucinous adenocarcinoma from colon                   |           |       | metastatic  | Ovary            | 0           |
| 55  | M   | Colon       | metastatic mucinous adenocarcinoma from colon                   |           |       | metastatic  | Liver            | 7           |
| 67  | F   | Colon       | metastatic mucinous adenocarcinoma from colon                   |           |       | metastatic  | Ovary            | 374         |
| 58  | M   | Colon       | metastatic adenocarcinoma from colon                            |           |       | metastatic  | Liver            | 700         |
| 58  | F   | Colon       | metastatic adenocarcinoma from colon                            |           |       | metastatic  | Liver            | 820         |
| 57  | M   | Colon       | metastatic adenocarcinoma from colon                            |           |       | metastatic  | Epiploon         | 894         |
| 60  | M   | Colon       | adenocarcinoma                                                  | T4N0M0    | IIBI  | primary     |                  | 141         |
| 45  | M   | Colon       | mucinous adenocarcinoma                                         | T4N2M0    | III   | primary     |                  | 340         |
| 37  | F   | Colon       | signet ring cell carcinoma                                      | T3N0M0    | IIA   | primary     |                  | 392         |
| 45  | M   | Colon       | mucinous adenocarcinoma                                         | T4N2M0    | III   | primary     |                  | 441         |
| 48  | M   | Colon       | signet-ring cell carcinoma                                      | T4N1M0    | II    | primary     |                  | 548         |
| 72  | F   | Colon       | adenocarcinoma                                                  | T4N0M0    | II    | primary     |                  | 578         |
| 22  | M   | Colon       | signet ring cell carcinoma                                      | T4N1M0    | III   | primary     |                  | 1137        |
| 65  | M   | Esophagus   | squamous cell carcinoma                                         | -         | II    | primary     |                  | 166         |
| 60  | M   | Esophagus   | adenocarcinoma                                                  | T3N1M0    | III   | primary     |                  | 171         |
| 59  | M   | Esophagus   | squamous cell carcinoma                                         | T3N0M0    | IIA   | primary     |                  | 0           |
| 50  | M   | Esophagus   | squamous cell carcinoma                                         | T3N0M0    | IIA   | primary     |                  | 0           |
| 61  | M   | Esophagus   | squamous cell carcinoma                                         | T2N0M0    | IIA   | primary     |                  | 0           |
| 53  | F   | Gallbladder | adenocarcinoma                                                  | T3N0M0    | IIA   | primary     |                  | 151         |
| 70  | F   | Gallbladder | adenocarcinoma                                                  | T1aN0M0   | I     | primary     |                  | 0           |
| 68  | M   | Gallbladder | adenocarcinoma                                                  | T2N0M0    | II    | primary     |                  | 0           |
| 66  | M   | Gallbladder | adenocarcinoma                                                  | T2N0M0    | II    | primary     |                  | 0           |
| 54  | M   | Gallbladder | adenocarcinoma                                                  | T2N1M0    | III   | primary     |                  | 0           |
| 54  | M   | Kidney      | clear cell carcinoma                                            | T1N0M0    | I     | primary     |                  | 0           |
| 30  | F   | Kidney      | clear cell carcinoma                                            | T3N0M1    | IV    | primary     |                  | 0           |
| 70  | M   | Kidney      | clear cell carcinoma                                            | T2N1M0    | III   | primary     |                  | 0           |
| 50  | M   | Liver       | metastatic adenocarcinoma from liver                            |           |       | metastatic  | Spleen           | 119         |
| 56  | M   | Liver       | hepatocellular carcinoma                                        | T2N0M0    | II    | primary     |                  | 19          |
| 57  | M   | Liver       | cholangiocellular carcinoma                                     | T3N0M0    | IIIA  | primary     |                  | 42          |
| 64  | M   | Liver       | hepatocellular carcinoma                                        | T2N0M0    | II    | primary     |                  | 0           |
| 49  | M   | Liver       | hepatocellular carcinoma                                        | T2N0M0    | II    | primary     |                  | 0           |
| 24  | M   | Liver       | sarcomatous hepatocellular carcinoma                            | T3N0M0    | IIIA  | primary     |                  | 0           |
| 60  | M   | Liver       | cholangiocellular carcinoma                                     | T3N0M0    | IIIA  | primary     |                  | 0           |
| 49  | M   | Liver       | clear cell carcinoma                                            | T2N0M0    | II    | primary     |                  | 0           |
| 46  | M   | Liver       | malignant fibrohistiocytoma                                     | T2N0M0 G1 | Ib    | primary     |                  | 0           |
| 55  | M   | Liver       | angiosarcoma                                                    | T2N0M0 G3 | IIIB  | primary     |                  | 0           |
| 76  | M   | Lung        | metastatic squamous cell carcinoma of abdominal wall            |           |       | metastatic  | Abdominal cavity | 0           |
| 48  | F   | Lung        | metastatic squamous cell carcinoma of neck from lung            |           |       | metastatic  | Lymph node       | 0           |
| 43  | F   | Lung        | metastatic adenocarcinoma of neck from lung                     |           |       | metastatic  | Lymph node       | 0           |
| 52  | M   | Lung        | metastatic squamous cell carcinoma of oter from lung            |           |       | metastatic  | Lymph node       | 36          |
| 53  | M   | Lung        | adenosquamous carcinoma                                         | T2N1M0    | II    | primary     |                  | 10          |
| 61  | M   | Lung        | squamous cell carcinoma                                         | T2N1M0    | II    | primary     |                  | 13          |
| 49  | M   | Lung        | adenocarcinoma                                                  | T2N0M0    | I     | primary     |                  | 19          |
| 51  | M   | Lung        | squamous cell carcinoma                                         | T3N0M0    | IIIA  | primary     |                  | 29          |
| 48  | M   | Lung        | large cell carcinoma                                            | T3N3M0    | IIIB  | primary     |                  | 45          |
| 22  | F   | Lung        | adenocarcinoma                                                  | T2N0M0    | I     | primary     |                  | 89          |
| 56  | F   | Lung        | papillary adenocarcinoma                                        | T2N0M0    | I     | primary     |                  | 230         |
| 43  | F   | Lung        | adenocarcinoma                                                  | T2N2M0    | IIA   | primary     |                  | 483         |
| 35  | M   | Lung        | atypical carcinoid                                              | T2N1M0    | II    | primary     |                  | 490         |
| 71  | M   | Lung        | adenocarcinoma                                                  | T2N1M0    | II    | primary     |                  | 573         |
| 41  | M   | Lung        | adenocarcinoma                                                  | T2N0M0    | I     | primary     |                  | 614         |
| 52  | M   | Lung        | bronchioloalveolar carcinoma                                    | T2N1M0    | II    | primary     |                  | 796         |
| 42  | M   | Lung        | adenocarcinoma                                                  | T2N0M0    | I     | primary     |                  | 0           |
| 67  | M   | Lung        | squamous cell carcinoma                                         | T2N1M0    | II    | primary     |                  | 0           |
| 70  | M   | Lung        | adenocarcinoma                                                  | T2N0M0    | I     | primary     |                  | 0           |
| 44  | M   | Lung        | small cell undifferentiated carcinoma                           | T2N1M0    | II    | primary     |                  | 0           |
| 43  | M   | Lung        | carcinoid                                                       | T2N0M0    | I     | primary     |                  | 0           |
| 57  | F   | Lung        | bronchioloalveolar carcinoma                                    | T2N1M0    | II    | primary     |                  | 0           |
| 30  | F   | Lung        | large cell carcinoma                                            | T2N1M0    | II    | primary     |                  | 0           |
| 34  | M   | Nasopharynx | metastatic squamous cell carcinoma of neck from nasopharynx     |           |       | metastatic  | Lymph node       | 0           |
| 35  | M   | Nasopharynx | metastatic squamous cell carcinoma of neck from nasopharynx     |           |       | metastatic  | Lymph node       | 0           |
| 49  | M   | Nasopharynx | metastatic squamous cell carcinoma of neck from nasopharynx     |           |       | metastatic  | Lymph node       | 0           |

| Supplementary Table S2 continued |   |                |                                                                            |         |      |            |                  |      |
|----------------------------------|---|----------------|----------------------------------------------------------------------------|---------|------|------------|------------------|------|
| 51                               | M | Nasopharynx    | metastatic squamous cell carcinoma of neck from nose                       |         |      | metastatic | Lymph node       | 0    |
| 51                               | M | Nasopharynx    | metastatic squamous cell carcinoma of neck from nasopharynx                |         |      | metastatic | Lymph node       | 4    |
| 64                               | F | Nasopharynx    | metastatic squamous cell carcinoma of neck from nasopharynx                |         |      | metastatic | Lymph node       | 7    |
| 64                               | F | Ovary          | metastatic serous papillary adenocarcinoma from ovary                      |         |      | metastatic | Epiploon         | 0    |
| 59                               | F | Ovary          | metastatic mucinous adenocarcinoma from ovary                              |         |      | metastatic | Epiploon         | 0    |
| 43                               | F | Ovary          | metastatic adenocarcinoma from ovary                                       |         |      | metastatic | Epiploon         | 0    |
| 59                               | F | Ovary          | metastatic serous adenocarcinoma from ovary                                |         |      | metastatic | Mesentery        | 0    |
| 49                               | F | Ovary          | metastatic serous adenocarcinoma of peritoneum from ovary                  |         |      | metastatic | Abdominal cavity | 368  |
| 42                               | F | Ovary          | mucinous adenocarcinoma                                                    | T1bNOM0 | lb   | primary    |                  | 15   |
| 43                               | F | Ovary          | serous papillary adenocarcinoma                                            | T1NOM0  | I    | primary    |                  | 32   |
| 52                               | F | Ovary          | serous papillary adenocarcinoma                                            | T1bNOM0 | lb   | primary    |                  | 34   |
| 41                               | F | Ovary          | mucinous adenocarcinoma                                                    | T1aNOM0 | la   | primary    |                  | 66   |
| 49                               | F | Ovary          | clear cell carcinoma                                                       | T1NOM0  | I    | primary    |                  | 88   |
| 26                               | F | Ovary          | serous papillary adenocarcinoma                                            | T1cNOM0 | Ic   | primary    |                  | 136  |
| 43                               | F | Ovary          | endometrioid adenocarcinoma                                                | T1bNOM0 | lb   | primary    |                  | 1170 |
| 37                               | F | Ovary          | clear cell carcinoma                                                       | T1aNOM0 | la   | primary    |                  | 0    |
| 40                               | F | Ovary          | endometrioid adenocarcinoma                                                | T2N1M0  | IIIc | primary    |                  | 0    |
| 25                               | F | Ovary          | granular cell tumor                                                        | T1NOM0  | I    | primary    |                  | 0    |
| 65                               | M | Pancreas       | metastatic adenocarcinoma from pancreas                                    |         |      | metastatic | Mesentery        | 45   |
| 52                               | M | Pancreas       | adenosquamous carcinoma                                                    | T3NOM0  | II   | primary    |                  | 26   |
| 52                               | M | Pancreas       | duct adenocarcinoma                                                        | T3NOM0  | II   | primary    |                  | 37   |
| 44                               | M | Pancreas       | duct adenocarcinoma                                                        | T3NOM0  | II   | primary    |                  | 42   |
| 51                               | F | Pancreas       | neuroendocrine carcinoma                                                   | -       | -    | primary    |                  | 53   |
| 57                               | M | Pancreas       | adenocarcinoma                                                             | T3NOM0  | II   | primary    |                  | 85   |
| 77                               | F | Pancreas       | duct adenocarcinoma                                                        | T2NOM0  | I    | primary    |                  | 863  |
| 56                               | M | Pancreas       | duct adenocarcinoma                                                        | T2N1M0  | III  | primary    |                  | 0    |
| 49                               | M | Pancreas       | adenosquamous carcinoma                                                    | T3NOM0  | II   | primary    |                  | 0    |
| 46                               | M | Pancreas       | pseudopapillary tumor                                                      | T2NOM0  | I    | primary    |                  | 0    |
| 54                               | F | Pancreas       | pseudopapillary tumor                                                      | T2NOM0  | I    | primary    |                  | 0    |
| 68                               | F | Pancreas       | leiomyosarcoma                                                             | T2NOM0  | lb   | primary    |                  | 0    |
| 60                               | M | Prostate       | undifferentiated carcinoma                                                 | T2NOM0  | -    | primary    |                  | 32   |
| 66                               | M | Prostate       | adenocarcinoma                                                             | T2NOM0  | II   | primary    |                  | 53   |
| 82                               | M | Prostate       | adenocarcinoma                                                             | T3NOM0  | III  | primary    |                  | 0    |
| 76                               | M | Prostate       | adenocarcinoma                                                             | T2NOM0  | III  | primary    |                  | 0    |
| 60                               | M | Prostate       | adenocarcinoma                                                             | T4N1M1c | IV   | primary    |                  | 0    |
| 64                               | M | Prostate       | adenocarcinoma                                                             | T3NOM1  | IV   | primary    |                  | 0    |
| 80                               | M | Prostate       | adenocarcinoma                                                             | T4N1M1c | IV   | primary    |                  | 0    |
| 75                               | M | Prostate       | adenocarcinoma                                                             | T2N1M1c | IV   | primary    |                  | 0    |
| 69                               | M | Prostate       | adenocarcinoma                                                             | T2NOM0  | II   | primary    |                  | 0    |
| 69                               | M | Prostate       | small acinous carcinoma                                                    | T2NOM0  | -    | primary    |                  | 0    |
| 76                               | M | Prostate       | adenocarcinoma                                                             | T3N1M1b | -    | primary    |                  | 0    |
| 72                               | M | Prostate       | adenocarcinoma                                                             | T3NOM0  | -    | primary    |                  | 0    |
| 64                               | M | Prostate       | adenocarcinoma                                                             | T1NOM0  | I    | primary    |                  | 0    |
| 73                               | M | Prostate       | adenocarcinoma                                                             | T2NOM0  | II   | primary    |                  | 0    |
| 70                               | M | Prostate       | adenocarcinoma                                                             | T3NOM0  | III  | primary    |                  | 0    |
| 71                               | M | Prostate       | adenocarcinoma                                                             | T2NOM0  | II   | primary    |                  | 0    |
| 64                               | M | Prostate       | adenocarcinoma                                                             | T2NOM0  | II   | primary    |                  | 0    |
| 61                               | M | Prostate       | adenocarcinoma                                                             | T3N1M0  | III  | primary    |                  | 0    |
| 65                               | M | Prostate       | adenocarcinoma                                                             | T2NOM0  | II   | primary    |                  | 0    |
| 66                               | M | Prostate       | adenocarcinoma                                                             | T3NOM0  | III  | primary    |                  | 0    |
| 75                               | M | Prostate       | adenocarcinoma                                                             | T2NOM0  | II   | primary    |                  | 0    |
| 72                               | M | Prostate       | leiomyosarcoma                                                             | T1NOM0  | la   | primary    |                  | 0    |
| 64                               | F | Rectum         | metastatic adenocarcinoma from rectum                                      |         |      | metastatic | Epiploon         | 40   |
| 63                               | F | Rectum         | metastatic adenocarcinoma from rectum                                      |         |      | metastatic | Liver            | 368  |
| 70                               | M | Stomach        | metastatic adenocarcinoma of abdominal wall from stomach                   |         |      | metastatic | Abdominal cavity | 222  |
| 65                               | M | Stomach        | metastatic adenocarcinoma from stomach                                     |         |      | metastatic | Lung             | 435  |
| 53                               | M | Stomach        | metastatic adenocarcinoma from stomach                                     |         |      | metastatic | Liver            | 528  |
| 50                               | F | Stomach        | adenocarcinoma                                                             | T3NOM0  | II   | primary    |                  | 68   |
| 56                               | M | Stomach        | adenocarcinoma                                                             | T3NOM0  | II   | primary    |                  | 151  |
| 42                               | M | Stomach        | carcinoid                                                                  | T3NOM0  | II   | primary    |                  | 275  |
| 66                               | M | Stomach        | adenocarcinoma                                                             | T2NOM0  | IB   | primary    |                  | 0    |
| 69                               | M | Stomach        | adenocarcinoma                                                             | T2NOM0  | IB   | primary    |                  | 0    |
| 50                               | F | Stomach        | adenocarcinoma                                                             | T3NOM0  | II   | primary    |                  | 0    |
| 55                               | M | Stomach        | adenocarcinoma                                                             | T3N4M0  | IIIb | primary    |                  | 0    |
| 42                               | M | Stomach        | carcinoid                                                                  | T3NOM0  | II   | primary    |                  | 0    |
| 1                                | M | Testis         | yolk sac tumor                                                             | T2NOM0  | I    | primary    |                  | 0    |
| 26                               | M | Testis         | seminoma                                                                   | T2NOM0  | I    | primary    |                  | 0    |
| 43                               | M | Testis         | seminoma                                                                   | T1NOM0  | I    | primary    |                  | 0    |
| 24                               | M | Testis         | embryonal carcinoma                                                        | T1NOM0  | I    | primary    |                  | 0    |
| 45                               | F | Thyroid gland  | metastatic papillary adenocarcinoma of right frontal lobe from thyroid     |         |      | metastatic | Cerebrum         | 0    |
| 64                               | M | Thyroid gland  | metastatic papillary carcinoma of neck from thyroid                        |         |      | metastatic | Lymph node       | 0    |
| 68                               | M | Thyroid gland  | metastatic papillary carcinoma of neck from thyroid                        |         |      | metastatic | Lymph node       | 0    |
| 49                               | F | Thyroid gland  | metastatic papillary carcinoma of neck from thyroid                        |         |      | metastatic | Lymph node       | 2    |
| 36                               | F | Thyroid gland  | papillary carcinoma                                                        | T2NOM0  | I    | primary    |                  | 647  |
| 19                               | F | Thyroid gland  | papillary carcinoma                                                        | T3NOM0  | I    | primary    |                  | 875  |
| 43                               | F | Unknown        | metastatic serous papillary adenocarcinoma of peritoneum from unknown site |         |      | metastatic | Abdominal cavity | 0    |
| 54                               | F | Unknown        | metastatic papillary adenocarcinoma of left cerebellum from unknown        |         |      | metastatic | Cerebrum         | 119  |
| 68                               | M | Unknown        | metastatic adenocarcinoma from unknown site                                |         |      | metastatic | Mesentery        | 218  |
| 65                               | M | Unknown        | metastatic mucinous adenocarcinoma from unknown site                       |         |      | metastatic | Epiploon         | 308  |
| 39                               | M | Unknown        | metastatic small cell carcinoma of neck from unknown site                  |         |      | metastatic | Lymph node       | 0    |
| 73                               | F | Unknown        | metastatic squamous cell carcinoma of neck from unknown site               |         |      | metastatic | Lymph node       | 92   |
| 45                               | F | Uterine cervix | squamous cell carcinoma                                                    | T3N1M0  | IIIB | primary    |                  | 7    |
| 49                               | F | Uterine cervix | squamous cell carcinoma                                                    | T1bNOM0 | IB   | primary    |                  | 11   |

| <b>Supplementary Table S3</b> Corresponding videos for figures in the main text. |                                                              |
|----------------------------------------------------------------------------------|--------------------------------------------------------------|
| <b>Video S1</b>                                                                  | Fig. 2 and Fig. 4 P-sel SRCC 22 year old                     |
| <b>Video S2</b>                                                                  | Fig. 2 hIlgG SRCC 22 year old                                |
| <b>Video S3</b>                                                                  | Fig. 2 P-sel SRCC 22 year old + EDTA at 15 seconds           |
| <b>Video S4</b>                                                                  | Fig. 2 and Fig. 4 P-sel SRCC 48 year old                     |
| <b>Video S5</b>                                                                  | Fig. 2 hIlgG SRCC 48 year old                                |
| <b>Video S6</b>                                                                  | Fig. 2 P-sel SRCC 48 year old + EDTA at 15 seconds           |
| <b>Video S7</b>                                                                  | Fig. 2 and Fig. 4 P-sel mucinous adenocarcinoma              |
| <b>Video S8</b>                                                                  | Fig. 3 P-sel SRCC 48 year old, high frame rate               |
| <b>Video S9</b>                                                                  | Fig. 4 HECA-452 SRCC 22 year old                             |
| <b>Video S10</b>                                                                 | Fig. 4 HECA-452 SRCC 48 year old                             |
| <b>Video S11</b>                                                                 | Fig. 5 P-sel adenocarcinoma                                  |
| <b>Video S12</b>                                                                 | Fig. 6 P-sel ovarian endometrioid adenocarcinoma             |
| <b>Video S13</b>                                                                 | Fig. 6 P-sel ovarian endometrioid adenocarcinoma + sialidase |
| <b>Video S14</b>                                                                 | Fig. 6 P-sel lung papillary adenocarcinoma                   |
| <b>Video S15</b>                                                                 | Fig. 6 P-sel lung papillary adenocarcinoma + sialidase       |
| <b>Video S16</b>                                                                 | Fig. 6 P-sel lung bronchioloalveolar carcinoma               |
| <b>Video S17</b>                                                                 | Fig. 6 P-sel lung bronchioloalveolar carcinoma + sialidase   |

**Video S1 (Fig. 2 and Fig. 4 P-sel SRCC 22 year old)**

P-selectin DBTA probes adhered to signet ring cell carcinoma (SRCC) tissue from a 22 year old patient.

**Video S2 (Fig. 2 P-sel SRCC 22 year old + EDTA at 15 seconds)**

P-selectin DBTA probes adhered to signet ring cell carcinoma (SRCC) tissue from a 48 year old patient was disrupted by the introduction of 10 mM EDTA, a divalent cation chelator that was used to remove Ca<sup>2+</sup> from the perfusion buffer.

**Video S3 (Fig. 2 hlgG SRCC 22 year old)**

With respect to P-selectin DBTA probes, significantly fewer human IgG (hlgG) DBTA probes adhered to signet ring cell carcinoma (SRCC) tissue from a 22 year old patient.

**Video S4 (Fig. 2 and Fig. 4 P-sel SRCC 48 year old)**

P-selectin DBTA probes adhered to colon mucinous adenocarcinoma tissue.

**Video S5 (Fig. 2 P-sel SRCC 48 year old + EDTA at 15 seconds)**

P-selectin DBTA probes adhered to signet ring cell carcinoma (SRCC) tissue from a 48 year old patient was disrupted by the introduction of 10 mM EDTA, a divalent cation chelator that was used to remove Ca<sup>2+</sup> from the perfusion buffer. Effects of EDTA can be seen after 15 seconds.

**Video S6 (Fig. 2 hlgG SRCC 48 year old)**

With respect to P-selectin DBTA probes, significantly fewer human IgG (hlgG) DBTA probes adhered to signet ring cell carcinoma (SRCC) tissue from a 48 year old patient.

**Video S7 (Fig. 2 and Fig. 4 P-sel mucinous adenocarcinoma)**

P-selectin DBTA probes adhered to colon mucinous adenocarcinoma tissue.

**Video S8 (Fig. 3 P-sel SRCC 48 year old, high frame rate)**

A representative P-selectin DBTA probe rolling on signet ring cell carcinoma (SRCC) tissue from a 48 year old patient is shown in this video, which was captured through a 40X objective at 175 frames per second.

**Video S9 (Fig. 4 HECA-452 SRCC 22 year old)**

HECA-452 DBTA probe adhered to signet ring cell carcinoma (SRCC) tissue from a 22 year old patient.

**Video S10 (Fig. 4 HECA-452 SRCC 48 year old)**

HECA-452 DBTA probe adhered to signet ring cell carcinoma (SRCC) tissue from a 48 year old patient.

**Video S11 (Fig. 5 P-sel adenocarcinoma)**

P-selectin DBTA probes adhered to colon adenocarcinoma tissue.

**Video S12 (Fig. 6 P-sel ovarian endometrioid adenocarcinoma)**

P-selectin DBTA probes adhered to ovarian endometrioid adenocarcinoma tissue.

**Video S13 (Fig. 6 P-sel ovarian endometrioid adenocarcinoma + sialidase treatment)**

Significantly fewer P-selectin DBTA probes adhered to ovarian endometrioid adenocarcinoma tissue following treatment with sialidase.

**Video S14 (Fig. 6 P-sel lung papillary adenocarcinoma)**

P-selectin DBTA probes adhered to lung papillary adenocarcinoma.

**Video S15 (Fig. 6 P-sel lung papillary adenocarcinoma + sialidase treatment)**

Significantly fewer P-selectin DBTA probes adhered to lung papillary adenocarcinoma tissue following treatment with sialidase.

**Video S16 (Fig. 6 P-sel lung bronchioloalveolar carcinoma)**

P-selectin DBTA probes adhered to lung bronchioloalveolar carcinoma.

**Video S17 (Fig. 6 P-sel lung bronchioloalveolar carcinoma + sialidase)**

Significantly fewer P-selectin DBTA probes adhered to lung bronchioloalveolar carcinoma tissue following treatment with sialidase.
